# Supplementary material for: Association between laryngopharyngeal reflux and obstructive sleep apnea in adults
Source: PeerJ. 2022 Apr 25;10:e13303. doi: 10.7717/peerj.13303 (PMC9053297; doi:10.7717/peerj.13303)
Supplement: Supplemental Information 1 — Samples’ characteristics, RFS, RSI, ESS, and AHI score [file peerj-10-13303-s001.xlsx]

## Sheet: Sheet1
AGE	BMI	AHI	SklAHI1	SklAHI2	ESS	SklESS	RSI	SklRSI	Hoarseness	Clearing throat	PND	Difficulty in swallowing	Coughing after eating	Choking	Cough	Lump in throat	Heartburn	RFS1	RFS2	RFS3	SklRFS1	SklRFS2	sklRFS3	Edmsbgl1	Edmsbgl2	Edmsbgl3	Vntrclr1	Vntrclr2	Vntclr3	Erythema1	Erythema2	Erythema3	Edmvf1	Edmvf2	Edmvf3	Dledm1	Dledm2	Dledm3	Hptcmps1	Hptcmps2	Hptcmps3	Grnloma1	Grnloma2	Grnloma3	Thick1	Thick2	Thick3
40	30.3	41	3	1	19	1	7	2	0	2	1	0	0	1	1	1	1	11	12	12	1	1	1	2	2	2	2	2	2	2	2	2	1	2	2	2	2	2	2	2	2	0	0	0	0	0	0
55	30.4	39	3	1	8	2	4	2	2	1	0	0	0	1	0	0	0	20	19	17	1	1	1	2	2	2	4	4	4	4	4	4	3	2	1	3	3	2	2	2	2	0	0	0	2	2	2
42	26.6	38	3	1	5	2	9	2	1	0	2	0	0	1	2	0	3	6	9	8	2	1	1	2	0	2	2	2	2	0	2	0	1	2	2	0	1	1	0	2	1	0	0	0	0	0	0
44	24.9	38	3	1	12	1	14	1	3	2	1	0	0	1	4	0	3	11	12	11	1	1	1	2	2	2	2	2	2	2	2	2	2	2	2	1	2	1	2	2	2	0	0	0	0	0	0
54	24.5	34	3	1	5	2	5	2	2	1	0	0	0	0	0	0	2	13	13	12	1	1	1	2	2	2	2	2	2	4	4	2	1	2	2	2	1	1	2	2	1	0	0	0	0	0	2
56	27.6	31	3	1	10	2	19	1	0	1	3	5	0	4	1	1	4	14	15	18	1	1	1	2	2	2	4	4	4	2	4	4	1	1	2	3	2	3	2	2	3	0	0	0	0	0	0
46	27.4	30	2	1	6	2	3	2	0	3	0	0	0	0	0	0	0	13	11	10	1	1	1	2	2	2	2	2	2	2	2	0	2	1	2	3	2	2	2	2	2	0	0	0	0	0	0
41	31.6	28	2	1	10	2	11	2	0	1	2	4	0	0	0	2	2	15	13	16	1	1	1	2	2	2	2	2	4	4	4	4	2	2	2	1	1	2	2	2	2	0	0	0	0	0	0
50	24.2	26	2	1	6	2	3	2	0	0	0	0	0	0	0	0	3	7	7	10	2	2	2	2	2	2	0	0	2	0	0	0	2	2	2	1	1	2	2	2	2	0	0	0	0	0	0
28	20.2	22	2	1	8	2	11	2	0	2	4	1	0	0	4	0	0	8	9	6	1	1	1	2	2	2	2	2	2	2	2	0	1	1	1	0	1	0	1	1	1	0	0	0	0	0	0
39	27.3	21	2	1	17	1	6	2	0	3	3	0	0	0	0	0	0	10	10	10	1	1	1	2	2	2	2	2	2	2	2	2	1	1	1	1	1	1	2	2	2	0	0	0	0	0	0
50	27.3	20	2	1	5	2	1	2	0	1	0	0	0	0	0	0	0	9	11	12	1	1	1	2	2	2	2	2	2	0	2	2	2	2	2	1	1	2	2	2	2	0	0	0	0	0	0
52	24.5	19	2	1	9	2	0	2	0	0	0	0	0	0	0	0	0	16	12	14	1	1	1	2	2	2	4	4	4	2	0	2	1	1	1	3	3	3	2	2	2	0	0	0	0	0	0
49	23.1	17	2	1	3	2	1	2	0	0	0	0	0	0	0	0	1	9	10	12	1	1	1	2	1	2	2	2	2	0	2	2	2	2	2	2	1	2	1	2	2	0	0	0	0	0	0
53	25.6	17	2	1	9	2	2	2	0	0	1	0	0	0	1	0	0	10	7	11	1	2	2	2	0	2	2	2	2	0	0	0	1	2	2	1	0	1	2	1	2	0	0	0	2	2	2
34	21.5	14	2	1	7	2	12	2	2	2	2	2	2	0	0	2	0	8	11	10	1	1	1	2	2	2	2	2	2	0	2	2	1	2	2	1	1	1	2	2	1	0	0	0	0	0	0
43	23.9	13	2	1	3	2	3	2	0	2	1	0	0	0	0	0	0	11	9	11	1	1	1	2	2	2	4	2	2	2	2	2	1	1	2	1	1	1	1	1	2	0	0	0	0	0	0
43	27.7	11	2	1	7	2	2	2	0	0	0	0	0	0	2	0	0	9	11	9	1	1	1	2	2	2	2	2	2	2	4	2	1	1	1	1	1	1	1	1	1	0	0	0	0	0	0
30	31.2	11	2	1	7	2	12	2	2	0	2	0	2	2	3	0	1	15	13	16	1	1	1	2	2	2	4	4	4	4	2	4	1	1	2	2	2	2	2	2	2	0	0	0	0	0	0
42	23.7	11	2	1	5	2	5	2	0	1	1	0	0	1	1	1	0	10	10	10	1	1	1	2	2	2	2	2	2	2	2	2	1	1	1	1	1	1	2	2	2	0	0	0	0	0	0
52	18.9	11	2	1	7	2	2	2	1	1	0	0	0	0	0	0	0	9	9	10	1	1	1	2	2	2	2	2	2	2	2	2	1	1	1	1	1	1	1	1	2	0	0	0	0	0	0
43	21.5	10	2	1	9	2	1	2	0	0	0	0	0	0	0	1	0	16	16	17	1	1	1	2	2	2	4	4	4	4	4	4	1	1	1	3	3	3	2	2	3	0	0	0	0	0	0
46	18.0	10	2	1	4	2	3	2	1	1	1	0	0	0	0	0	0	13	15	19	1	1	1	2	2	2	4	4	4	0	2	4	1	1	1	3	3	4	3	3	4	0	0	0	0	0	0
48	28.3	10	2	1	6	2	2	2	0	0	0	0	0	0	2	0	0	15	16	17	1	1	1	2	2	2	4	4	4	0	2	2	2	1	2	3	3	3	2	2	2	0	0	0	2	2	2
35	30.8	21	2	1	19	1	7	2	0	1	1	1	0	0	0	1	3	11			1			2			2			2			1			1			1			0			2
52	28.4	18	2	1	5	2	0	2	0	0	0	0	0	0	0	0	0	6			2			2			2			0			0			1			1			0			0
52	27.3	14	2	1	17	1	15	1	1	2	2	4	4	0	0	2	0	6	6	6	2	2	2	2	2	2	2	2	2	0	0	0	0	0	0	0	0	0	0	0	0	0	0	0	2	2	2
31	32.7	14	2	1	5	2	18	1	0	5	5	0	2	2	2	1	1	10	9	11	1	1	1	2	2	2	2	2	2	2	2	2	1	1	2	1	1	1	2	1	2	0	0	0	0	0	0
48	29.0	12	2	1	15	1	24	1	3	4	4	1	0	3	2	2	5	14			1			2			4			2			1			2			3			0			0
26	28.9	10	2	1	5	2	14	1	2	4	1	0	2	1	2	0	2	14	13	12	1	1	1	2	2	2	2	2	2	4	4	4	2	1	2	2	2	2	2	2	2	0	0	0	0	0	0
29	24.2	28	2	1	12	1	14	1	2	2	3	0	0	0	3	2	2	9	9	10	1	1	1	2	2	2	2	2	2	2	2	2	1	1	1	1	1	1	1	1	2	0	0	0	0	0	0
32	27.9	28	2	1	8	2	0	2	0	0	0	0	0	0	0	0	0	8			1			2			2			0			1			1			2			0			0
46	29.8	0	1	2	21	1	5	2	0	1	2	0	0	0	2	0	0	11	14	16	1	1	1	2	2	2	2	2	2	0	2	4	2	2	2	1	2	2	2	2	2	0	0	0	2	2	2
60	23.7	1	1	2	6	2	1	2	0	1	0	0	0	0	0	0	0	14	14	14	1	1	1	2	2	2	2	2	2	2	2	2	2	2	2	2	2	2	2	2	2	0	0	0	2	2	2
40	22.9	1	1	2	5	2	7	2	3	1	0	0	0	0	0	1	2	15	17	17	1	1	1	2	2	2	2	2	2	4	4	4	1	2	1	3	3	3	1	2	3	0	0	0	2	2	2
38	22.8	1	1	2	5	2	6	2	0	3	0	0	0	3	0	0	0	11	13	18	1	1	1	2	2	2	4	2	4	0	4	4	1	1	2	2	2	3	2	2	3	0	0	0	0	0	0
58	19.2	1	1	2	9	2	7	2	0	3	1	0	0	1	2	0	0	11	12	11	1	1	1	2	2	2	0	2	2	2	2	2	2	1	2	1	1	1	2	2	2	0	0	0	2	2	0
43	26.0	1	1	2	10	2	1	2	0	0	0	0	1	0	0	0	0	8	12	14	1	1	1	2	2	2	2	4	4	0	0	2	2	2	2	1	2	2	1	2	2	0	0	0	0	0	0
31	17.0	1	1	2	6	2	2	2	1	1	0	0	0	0	0	0	0	11	11	11	1	1	1	2	2	2	2	2	2	2	2	2	2	2	2	1	1	1	2	2	2	0	0	0	0	0	0
54	20.1	1	1	2	13	1	6	2	0	1	1	0	1	1	1	1	0	22	21	20	1	1	1	2	2	2	4	4	4	4	4	4	2	2	1	4	3	3	4	4	4	0	0	0	2	2	2
28	20.3	1	1	2	11	1	1	2	0	0	0	0	0	0	0	0	1	12	11	10	1	1	1	2	2	2	2	2	2	4	2	2	0	1	1	2	2	1	2	2	2	0	0	0	0	0	0
51	20.3	1	1	2	10	2	1	2	0	0	0	0	0	1	0	0	0	5	5	5	2	2	2	2	2	2	2	2	2	0	0	0	0	0	0	0	0	0	1	1	1	0	0	0	0	0	0
28	24.7	2	1	2	9	2	12	2	0	0	2	3	3	0	2	0	2	12	12	12	1	1	1	2	2	2	2	2	2	4	4	2	1	2	2	1	1	2	2	1	2	0	0	0	0	0	0
55	25.2	2	1	2	6	2	30	1	3	1	5	1	5	3	5	5	2	16	19	18	1	1	1	2	2	2	4	4	2	4	4	4	1	2	2	3	3	3	2	2	3	0	0	0	0	0	2
55	32.0	2	1	2	12	1	9	2	0	2	2	0	1	0	1	0	3	11	5	12	1	2	1	2	2	2	2	2	2	2	0	2	2	0	1	1	0	1	2	1	2	0	0	0	0	0	2
37	29.2	2	1	2	10	2	6	2	0	1	3	0	0	0	1	1	0	18	16	18	1	1	1	2	2	2	4	4	4	4	4	4	2	2	2	3	2	3	3	2	3	0	0	0	0	0	0
49	26.9	2	1	2	3	2	7	2	0	3	0	2	0	0	2	0	0	11	11	9	1	1	1	2	2	2	2	2	2	2	2	2	1	1	1	2	2	1	2	2	1	0	0	0	0	0	0
42	26.5	2	1	2	9	2	3	2	0	0	1	0	0	0	0	0	2	13	13	13	1	1	1	2	2	2	2	2	2	2	2	2	2	2	2	1	1	1	2	2	2	0	0	0	2	2	0
33	17.2	3	1	2	12	1	1	2	0	0	1	0	0	0	0	0	0	8	9	9	1	1	1	2	2	2	0	0	0	2	2	2	1	2	2	1	1	1	2	2	2	0	0	0	0	0	0
53	28.2	3	1	2	10	2	10	2	0	1	2	1	0	1	2	2	1	14	16	16	1	1	1	2	2	2	4	4	4	2	4	4	1	1	2	3	3	2	2	2	2	0	0	0	0	0	0
36	23.9	3	1	2	11	1	1	2	0	0	0	0	0	0	0	0	1	15	12	15	1	1	1	2	2	2	2	2	2	4	2	4	2	2	2	2	2	2	3	2	3	0	0	0	0	0	0
46	26.0	3	1	2	10	2	2	2	0	0	0	1	0	1	0	0	0	16	15	16	1	1	1	2	2	2	4	4	4	4	4	4	3	2	2	2	2	2	1	1	2	0	0	0	0	0	0
27	19.7	3	1	2	14	1	19	1	2	3	3	2	1	1	4	2	3	2	4	3	2	2	2	0	0	0	0	0	0	0	0	0	1	1	1	0	1	1	1	2	1	0	0	0	0	0	0
34	25.5	3	1	2	8	2	9	2	0	2	3	0	0	0	2	2	0	9	11	6	1	1	2	2	2	2	2	2	2	0	2	0	1	1	0	2	2	1	2	2	1	0	0	0	0	0	0
37	22.8	3	1	2	13	1	3	2	1	0	0	0	0	0	1	0	1	8	10	11	1	1	1	2	2	2	0	0	0	0	2	2	2	2	2	1	1	1	1	1	2	0	0	0	2	2	2
40	26.4	4	1	2	0	2	1	2	0	0	1	0	0	0	0	0	0	17	13	18	1	1	1	2	2	2	4	4	4	4	2	4	1	1	2	3	2	3	3	2	3	0	0	0	0	0	0
56	22.3	4	1	2	7	2	6	2	0	1	2	0	0	0	0	2	1	15	13	12	1	1	1	2	2	2	2	2	2	4	2	2	2	2	2	3	3	2	2	2	2	0	0	0	0	0	0
31	22.8	4	1	2	6	2	4	2	0	1	0	0	0	1	0	0	2	12	10	10	1	1	1	2	2	2	2	2	2	2	2	2	2	1	1	2	1	1	2	2	2	0	0	0	0	0	0
58	19.2	4	1	2	3	2	1	2	0	1	0	0	0	0	0	0	0	15	16	18	1	1	1	2	2	2	2	4	4	2	2	4	2	4	3	4	2	3	1	2	2	0	0	0	0	0	0
40	23.9	4	1	2	9	2	9	2	1	1	1	0	1	1	1	0	3	5	10	9	2	1	1	2	2	2	0	2	2	0	0	0	2	1	2	0	1	1	1	2	2	0	0	0	2	2	0
45	23.5	4	1	2	3	2	1	2	0	0	0	0	0	0	0	0	1	14	16	16	1	1	1	2	2	2	4	2	2	0	4	4	2	1	2	2	3	2	2	2	2	0	0	0	2	2	2
45	25.7	4	1	2	5	2	1	2	0	0	1	0	0	0	0	0	0	15	12	15	1	1	1	2	2	2	2	2	2	4	2	4	2	2	2	3	2	2	2	2	3	0	0	0	0	0	0
37	24.9	4	1	2	11	1	11	2	2	3	1	1	0	0	0	1	3	8	10	10	1	1	1	2	2	2	2	2	2	0	2	2	1	1	1	1	1	1	2	2	2	0	0	0	0	0	0
35	20.3	5	1	2	4	2	2	2	1	0	0	0	0	0	0	0	1	10	9	10	1	1	1	2	2	2	2	2	2	2	2	2	2	1	2	1	1	1	1	1	1	0	0	0	0	0	0
										BMI	=	Body Mass Indeks
										AHI	=	Apnea Hypopnea Indeks
										ESS	=	Epworth Sleepiness Scale
										PND	=	Post Nasal Drip
										RFS	=	Reflux Finding Score
										RSI	=	Reflux Symptom Index
										Edmsbgl	=	Subglottic Edema
										Vntrclr	=	Ventricular Obliteration
										Edmvf	=	Vocal Fold Edema
										Dledm	=	diffuse laryngeal edema
										Hptcmps	=	posterior commissure hypertrophy
										Grnlm	=	granulation tissue
